# Supplementary material for: Priming mycobacterial ESX-secreted protein B to form a channel-like structure
Source: bioRxiv or medRxiv preprint supplement (doi:10.1101/2021.01.02.425093), 2021-01-04
Supplement: Supplementary file [file media-1.pdf]

Multiple sequence alignment of M. tuberculosis and other Mycobacterium species. Columns are labeled with residue numbers (e.g., 100, 200, 300, 400, 500, 600, 700, 800, 900, 1000, 1100, 1200). Rows list species and their GenBank accession numbers. The alignment shows conserved regions across the different strains.

Multiple sequence alignment of M. tuberculosis and other Mycobacterium species. Columns are labeled with residue numbers (e.g., 131M, 141E, 150A, 160N, 170F, 175N, 185E, 195I, 205M, 215L, 225T, 235L, 242A). Rows list species and their GenBank accession numbers. The alignment shows conserved regions across the different strains.

Multiple sequence alignment of M. tuberculosis and other Mycobacterium species. Columns are labeled with residue numbers (e.g., 246I, 256R, 266, 273V, 280P, 290P, 300L, 309V, 319P, 329G, 339L, 349L, 358A, 368V). Rows list species and their GenBank accession numbers. The alignment shows conserved regions across the different strains.

Multiple sequence alignment of M. tuberculosis and other Mycobacterium species. Columns are labeled with residue numbers (e.g., 378G, 383, 387G, 390, 390, 390, 394L, 404A, 414M, 422G, 431, 439E, 449G, 459S). Rows list species and their GenBank accession numbers. The alignment shows conserved regions across the different strains.
