# Supplementary material for: Priming mycobacterial ESX-secreted protein B to form a channel-like structure
Source: bioRxiv or medRxiv preprint supplement (doi:10.1101/2021.01.02.425093), 2021-01-04

A

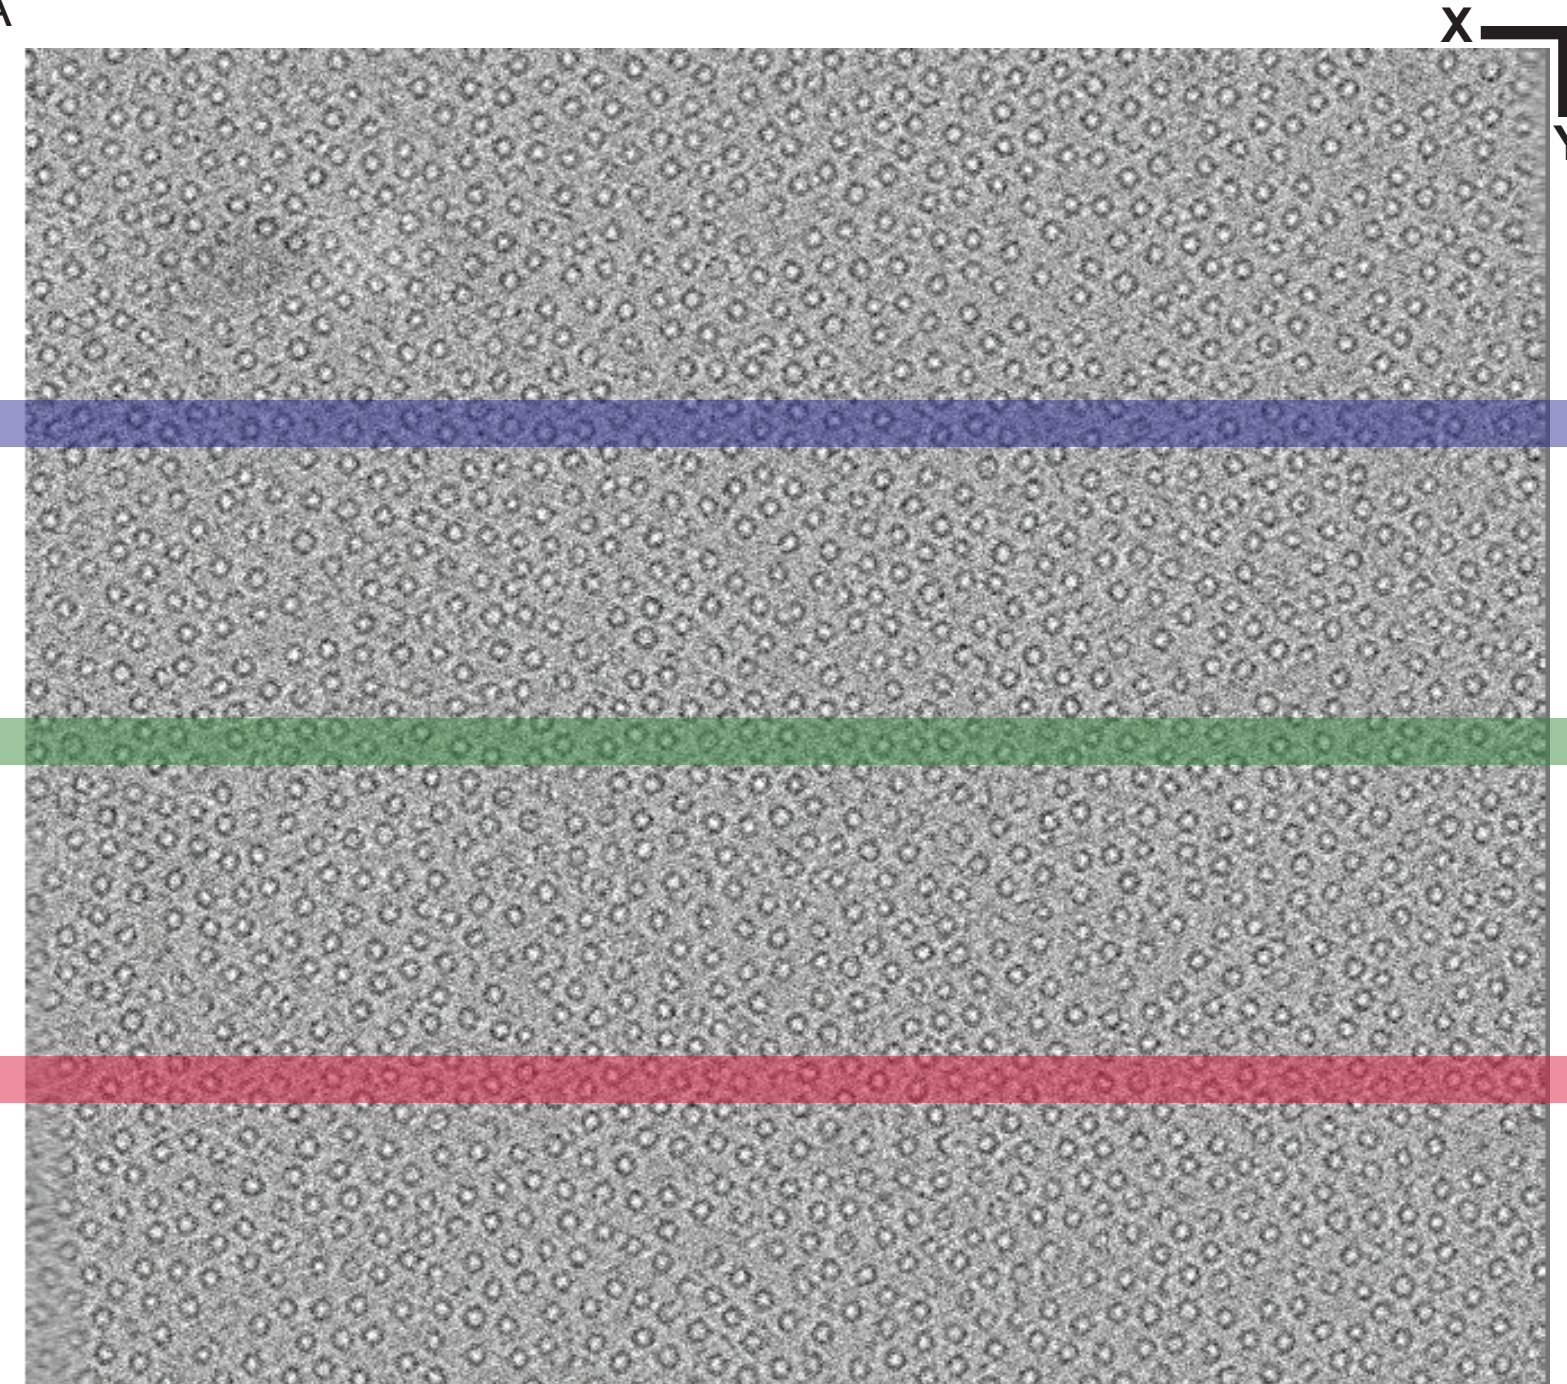

B

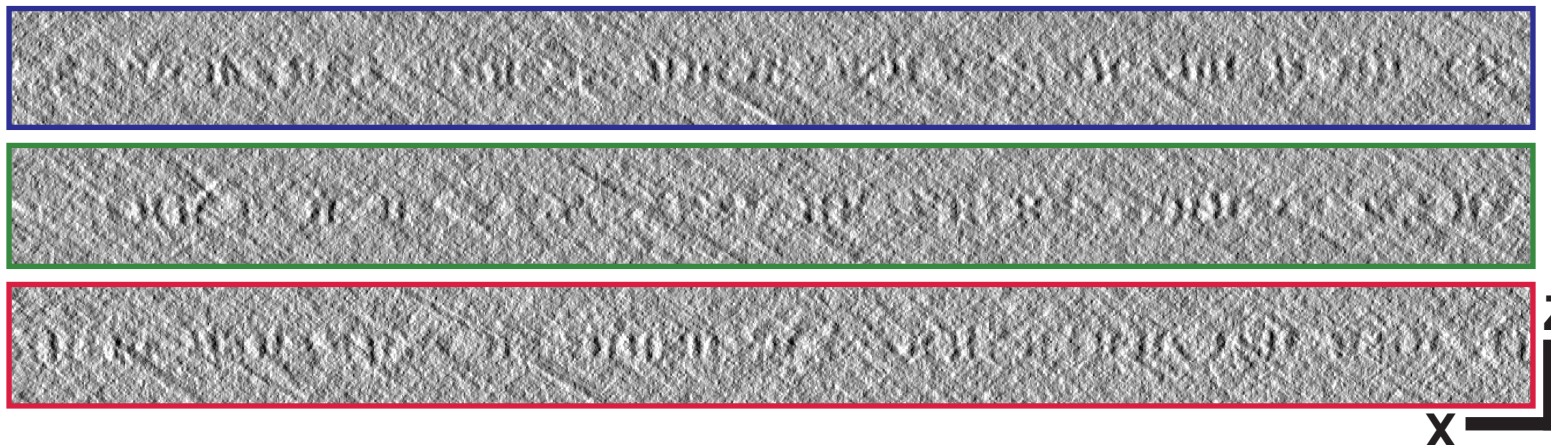

Supplement: Supplementary file [file media-2.pdf]
